# Supplementary material
Source: bioRxiv or medRxiv preprint supplement (https://www.biorxiv.org/highwire/filestream/108602/field_highwire_adjunct_files/13/178806-21.pdf)
Supplement: Supplementary file [file 178806-21.pdf]

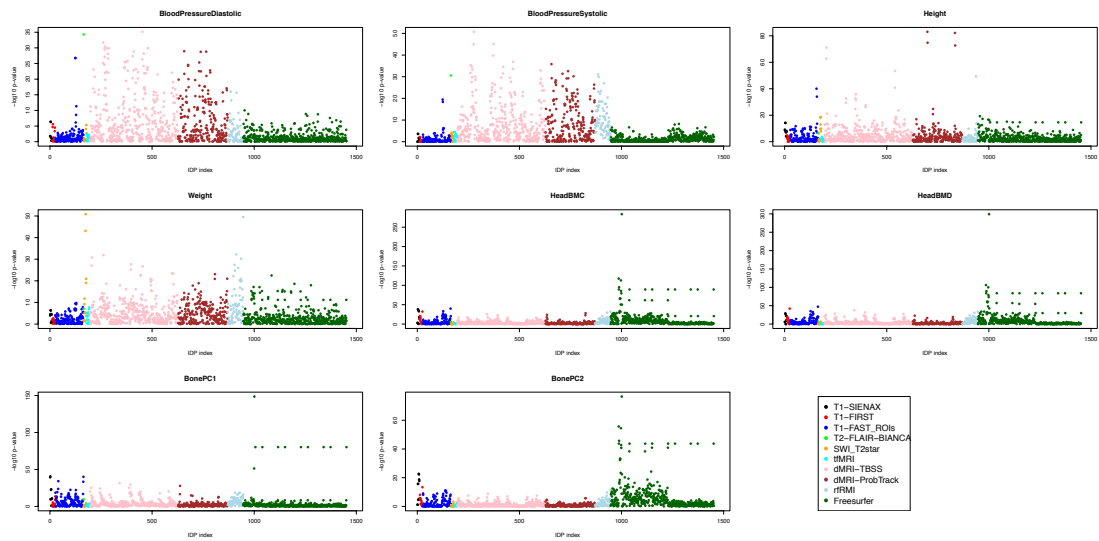

**Supplementary Figure 21. Association of IDPs with Body Confounds.** Each plot shows the association of a body confound measure with all of the IDPs except the resting fMRI parcellation edges.
